# Supplementary material
Source: PubMed Central journal article supplement (PMC10272292)
Supplement: NIHMS1851115-supplement-1.pdf [file NIHMS1851115-supplement-1.pdf]

## Supplemental Material

### Supplemental Methods

**Hippocampal Volume MRI Acquisition and Processing.** Sagittal T<sub>1</sub>-weighted 3D fast spoiled gradient echo (FSPGR) sequences were acquired with the same scanners (TE=3.164 msec, TR=8.084 msec, TI=600 msec, flip angle=8°, matrix=256 x 192, in-plane resolution=1 x 1 mm, slice thickness=1.2 mm, slices=172). MR images were processed using as described previously but updated with latest software (Kremen et al., 2010). Briefly, this involved correction of distortion due to gradient nonlinearity (Jovicich et al., 2006), image intensity normalization, rigid registration into standard orientation with 1 mm isotropic voxel size, and removal of non-brain tissue. As an update from Kremen et al. (2010, Wave 3 atlas-based volumetric segmentation (Fischl et al., 2002; Fischl et al., 2004) was performed using FreeSurfer version 6.0 (<http://surfer.nmr.mgh.harvard.edu>). Subcortical segmentations were visually reviewed, and participants with inaccurate segmentations (defined by obvious overestimation or underestimation on the segmentation atlas via a detailed lab protocol) were excluded from analysis ( $n=24$ ). The analytical sample included 361 participants. Estimated hippocampal volume and estimated total intracranial volume were obtained from FreeSurfer's automated segmentation statistics. Hippocampal volume was adjusted (residualized) for an individual's estimated intracranial volume.

**Objective Cognitive Function.** Objective cognitive function was measured using a two-step approach in which cognitive domains are modeled as latent variables in SEM models using the larger VETSA samples at Wave 1 ( $n=1237$ ), Wave 2 ( $n=1261$ ), and Wave 3 ( $n=1196$ ), and then are exported as factor scores to analyze within the smaller sample with LC imaging (see Kremen et al., 2019 for a thorough description of these larger samples). The two-step method is

recommended for small samples (Anderson et al., 1988; Burt et al., 1976, Smid & Rosseel, 2020), and most suitable when the factor scores will be independent variables rather than dependent variables (Devlieger et al., 2016). The two-step method also produces results that are more conservative and generalizable in that they can be used by other researchers and/or clinicians to examine relationships in new samples without having to refit new latent variable models.

Regarding the larger SEM model done before exporting factor scores, we inverted scores on time-based measures (i.e., Trails Making Task) prior to estimating the latent variable, so that higher scores on the latent liability indicated better cognitive function. Regarding invariance, latent variables at every VETSA wave were able to have equal factor loadings without significantly worse model fit than a freely estimated model based on the ratio of their loglikelihoods ( $ps > .05$ ), indicating configural and weak invariance. Strong invariance was not assumed. Not only does variance increase with cognitive aging, i.e., cognitive function becomes more heterogeneous (Schaie et al., 1998), but we would not expect equal intercepts. For this reason, strong invariance is not expected for models of developmental change and aging (Haberstumpf et al., 2022; Pentz et al., 1994, Tyrell et al., 2019). All factor scores are standardized with respect to Wave 1. Therefore, the mean at the third wave is negative (reflecting group level decline since Wave 1) and the standard deviation is not exactly 1 (reflecting slight changes in variance since baseline). For our analyses, factor scores at Wave 3 were adjusted for practice effects via methods previously described (Elman et al., 2018). Description of factor scores are listed below:

**Episodic memory:** The episodic memory factor score is based on the combined number of correctly recalled words on the short and delayed portions and the total number of words

recalled across the five learning trials (i.e., the sum of all correct responses across learning trials 1 through 5) of the California Verbal Learning Test-II (CVLT-II) (Delis, Kaplan, & Kramer, 2001) and the combined number of correctly recalled story details on the immediate and delayed portions of the Wechsler Memory Scale-III Logical Memory test and the WMS-III Visual Reproductions test (Wechsler, 1997, 1997). An SEM model of the larger VETSA sample has shown good overall fit for the latent variable model used to derive the episodic memory factor score (CFI=.98, TLI=.97, RMSEA=.04; Gustavson et al., 2022). More details on these measures and factor score creation are available in prior work (Gustavson et al., 2018; Gustavson et al., 2019; Sanderson-Cimino et al., 2019).

**Executive function:** We derived a factor score of executive function using measures of inhibition (color-word trial of the Golden and Freshwater (2002) Stroop test adjusted for non-interference conditions); shifting (reaction time on Condition 4 of the Delis-Kaplan Executive Function System Trail Making task (Delis, Kaplan, & Kramer, 2001; Delis et al., 2001), and working memory span (total number of trials completed on the Letter-Number Sequencing and Digit Span tasks from Wechsler Memory Scale (Wechsler, 1997). An SEM model of the larger VETSA sample has shown good overall fit for the latent variable model used to derive the executive function factor score (CFI=.98, TLI=.97, RMSEA=.03; Gustavson et al., 2022). More details on these measures and factor score creation are available in prior work (Gustavson et al., 2018; Gustavson et al., 2019; Sanderson-Cimino et al., 2019).

**Verbal fluency:** DKEFS Letter and Category fluency were used to capture verbal fluency. The factor score was derived from the total number of correctly named words in selected Letters and Categories. An SEM model of the larger VETSA sample has shown good overall fit for the latent variable model used to derive the episodic memory factor score

(CFI=.99, TLI=.96; RMSEA=.03; Gustavson et al., 2019). More details on these measures and factor score creation are available in prior work (Gustavson et al., 2018; Gustavson et al., 2019; Sanderson-Cimino et al., 2019)).

**Visuospatial ability:** Visuospatial ability was captured using accuracy scores on the Gottschaldt Hidden Figures task (Gottschaldt, 1929) and the WMS-III Visual Reproductions Copy task (Wechsler, 1997). We calculated an SEM model from the larger VETSA sample and found that the latent variable model used to derive the visuospatial factor score had good overall fit (CFI=.97, TLI=.95; RMSEA=.03).

**Global cognition:** This factor score was derived using an SEM model estimating latent variables for each wave from the aforementioned factor scores at each wave. We calculated an SEM model from the larger VETSA sample and found that the latent variable model used to derive the global cognition factor score had good overall fit (CFI=.96, TLI=.95; RMSEA=.05).

**Young-adult cognitive ability.** Young adult cognitive ability was measured using the Armed Forces Qualification Test (AFQT) that was given to all participants at average age 20. The AFQT test is highly correlated with the Weschler Adult Intelligence Scale ( $r=.84$ ) (Lyons et al., 2017; Lyons et al., 2009). This measure was used to adjust for longstanding differences in cognitive ability. Education is commonly used as an estimate of earlier/premorbid cognitive ability, but we were able to take advantage of having an actual measure of general cognitive ability. We have shown that the AFQT is much more sensitive measure than education (Vuoksimaa et al., 2013). In supplemental analyses, we examined education instead as a comparison.

**Depressive symptoms.** Depressive symptoms at Wave 3 were assessed using the 20-item Center of Epidemiological Studies Depression scale (CES-D) (Radloff, 2016). Individuals rated how often they experienced 20 symptoms of depression in the last 2 weeks on a five-point Likert-type scale: Not at all or less than one day (0); 1-2 days (1), 3-4 days (2), 5-7 days (3); Nearly every day for 2 weeks (4). Four items were rated in reverse fashion. Scores are summed into a total depressive symptoms score.

**Physical morbidities.** Physical morbidities at Wave 3 included the total number of self-reported medical conditions, including heart attack, heart failure, peripheral vascular disease, thrombolysis, hypertension, angina, diabetes, bronchitis, asthma, cancer, osteoarthritis, rheumatoid arthritis, and cirrhosis. These conditions were selected as they are noted on the Charlson, an index of major deadly conditions (Charlson, Pompei, Ales, & MacKenzie, 1987).

**Objective Cognitive Decline.** Objective cognitive decline was obtained using data in a subset of individuals ( $n=287$ ) who completed tests at Wave 1, which occurred around 12 years before Wave 3. Task-measured objective cognitive decline was measured as the change in outputted factor scores (standardized to baseline mean and standard deviation) from Wave 1 to Wave 3. This was acceptable due to configural and weak invariance, i.e., equivalent factor loadings at Waves 1 and 3. Subtracting Wave 3 scores from Wave 1 scores (Wave 1-Wave 3) were used to capture individual-specific cognitive decline. Measures of objective cognitive decline were calculated for episodic memory, executive function, verbal fluency, visuospatial ability, and global cognitive function.

**Mild Cognitive Impairment.** MCI classification at Wave 3 followed the Jak-Bondi approach that only uses objective cognitive performance (Bondi et al., 2014; Jak et al., 2009). Specifically, MCI was defined as performing  $>1.5$  SDs on 2 or more tasks within a cognitive domain after

adjusting for age and education. We also adjusted for young-adult cognitive ability using a measure of general cognitive ability completed at average age 20 (Armed Forces Qualification Test) when VETSA participants were inducted into the Armed Forces. Adjustment for young-adult cognitive ability has been shown to improve the detection of MCI, which is related to AD polygenic risk scores (Logue et al., 2019) and lower hippocampal volume (Jak et al., 2015). We also adjusted test scores for practice effects using data from attrition replacements who completed cognitive tests for the first time at Wave 2 ( $n=179$ ). We have previously shown in VETSA that adjusting for practice effects identified a greater number of MCI cases that were less likely to revert to normal performance (Elman et al., 2018).

## Supplemental Results

**Covariates and ECOG Scores.** In the analyses with rostral-middle LC as the main predictor, greater depressive symptoms were related to greater decline in participant-rated subjective memory ( $\beta=.20$ , 95% CI [.10, .30],  $p<.001$ ), subjective executive function ( $\beta=.24$ , 95% CI [.24, .34],  $p<.001$ ), subjective language ( $\beta=.25$ , 95% CI [.15, .35],  $p<.001$ ), and subjective visuospatial ability ( $\beta=.18$ , 95% CI [.08, .28],  $p=.005$ ). A higher number of physical morbidities related to greater decline in participant-rated subjective memory ( $\beta=.13$ , 95% CI: [.03, .22],  $p=.033$ ) but no other participant-rated ECOG subscale ( $ps>.05$ ). Older age was related to greater decline in participant-rated subjective language ( $\beta=.13$ , 95% CI [.03, .23],  $p=.033$ ) but no other participant-rated ECOG subscale ( $ps>.05$ ).

### Supplemental References

- Anderson, J. C., & Gerbing, D. W. (1988). Structural equation modeling in practice: A review and recommended two-step approach. *Psychological Bulletin*, 103(3), 411-423.
- Burt, R. S. (1976). Interpretational confounding of unobserved variables in structural equation models. *Sociological Methods & Research*, 5(1), 3-52.  
doi:10.1177/004912417600500101.
- Charlson, M. E., Pompei, P., Ales, K. L., & MacKenzie, C. R. (1987). A new method of classifying prognostic comorbidity in longitudinal studies: development and validation. *J Chronic Dis*, 40(5), 373-383. doi:10.1016/0021-9681(87)90171-8
- Delis, D. C., Kaplan, E., & Kramer, J. H. (2001). *Delis-Kaplan Executive Function System (D-KEFS)*. San Antonio, TX: Psychological Corporation.
- Devlieger, I., Mayer, A., & Rosseel, Y. (2016). Hypothesis testing using factor score regression: A comparison of four methods. *Educational and Psychological Measurement*, 76(5), 741-770. doi: <https://doi.org/10.1177%2F0013164415607618>
- Elman, J. A., Jak, A. J., Panizzon, M. S., Tu, X. M., Chen, T., Reynolds, C. A., . . . Kremen, W. S. (2018). Underdiagnosis of mild cognitive impairment: A consequence of ignoring practice effects. *Alzheimers Dement (Amst)*, 10, 372-381.  
doi:10.1016/j.dadm.2018.04.003
- Fischl, B., Salat, D. H., Busa, E., Albert, M., Dieterich, M., Haselgrove, C., . . . Dale, A. M. (2002). Whole brain segmentation: automated labeling of neuroanatomical structures in the human brain. *Neuron*, 33(3), 341-355. doi:[http://dx.doi.org/10.1016/S0896-6273\(02\)00569-X](http://dx.doi.org/10.1016/S0896-6273(02)00569-X)

- Fischl, B., Salat, D. H., van der Kouwe, A. J., Makris, N., Segonne, F., Quinn, B. T., & Dale, A. M. (2004). Sequence-independent segmentation of magnetic resonance images. *NeuroImage*, *23 Suppl 1*, S69-84. doi:10.1016/j.neuroimage.2004.07.016
- Gottschaldt, K. (1929). Über den Einfluss der Erfahrung auf die Wahrnehmung von Figuren. II. Vergleichende Untersuchungen über die Wirkung figuraler Einprägung und den Einfluss spezifischer Geschehensverläufe auf die Auffassung optischer Komplexe. *Psychologische Forschung*.
- Gustavson, D. E., Panizzon, M. S., Franz, C. E., Friedman, N. P., Reynolds, C. A., Jacobson, K. C., . . . Kremen, W. S. (2018). Genetic and environmental architecture of executive functions in midlife. *Neuropsychology*, *32*(1), 18-30. doi:10.1037/neu0000389
- Gustavson, D. E., Panizzon, M. S., Franz, C. E., Reynolds, C. A., Corley, R. P., Hewitt, J. K., . . . Friedman, N. P. (2019). Integrating verbal fluency with executive functions: Evidence from twin studies in adolescence and middle age. *J Exp Psychol Gen*, *148*(12), 2104-2119. doi:10.1037/xge0000589
- Haberstumpf, S., Forster, A., Leinweber, J., Rauskolb, S., Hewig, J., Sendtner, M., ... & Herrmann, M. J. (2022). Measurement invariance testing of longitudinal neuropsychiatric test scores distinguishes pathological from normative cognitive decline and highlights its potential in early detection research. *Journal of Neuropsychology*, *16*(2), 324-352. doi: <https://doi.org/10.1111/jnp.12269>
- Jak, A. J., Panizzon, M. S., Spoon, K. M., Fennema-Notestine, C., Franz, C. E., Thompson, W. K., . . . Kremen, W. S. (2015). Hippocampal Atrophy Varies by Neuropsychologically Defined MCI Among Men in Their 50s. *American Journal of Geriatric Psychiatry*, *23*(5), 456-465. doi:10.1016/j.jagp.2014.08.011



- Jovicich, J., Czanner, S., Greve, D., Haley, E., van der Kouwe, A., Gollub, R., . . . Dale, A. (2006). Reliability in multi-site structural MRI studies: effects of gradient non-linearity correction on phantom and human data. *NeuroImage*, *30*(2), 436-443. Retrieved from [http://www.ncbi.nlm.nih.gov/entrez/query.fcgi?cmd=Retrieve&db=PubMed&dopt=Citation&list\\_uids=16300968](http://www.ncbi.nlm.nih.gov/entrez/query.fcgi?cmd=Retrieve&db=PubMed&dopt=Citation&list_uids=16300968)
- [http://ac.els-cdn.com/S1053811905007299/1-s2.0-S1053811905007299-main.pdf?\\_tid=74681ac6-406b-11e5-a333-00000aacb35d&acdnat=1439326776\\_c2d3c4d7d3b04b9db68af4ddd063a04d](http://ac.els-cdn.com/S1053811905007299/1-s2.0-S1053811905007299-main.pdf?_tid=74681ac6-406b-11e5-a333-00000aacb35d&acdnat=1439326776_c2d3c4d7d3b04b9db68af4ddd063a04d)
- Kremen, W. S., Prom-Wormley, E., Panizzon, M. S., Eyster, L. T., Fischl, B., Neale, M. C., . . . Fennema-Notestine, C. (2010). Genetic and environmental influences on the size of specific brain regions in midlife: the VETSA MRI study. *NeuroImage*, *49*(2), 1213-1223. doi:10.1016/j.neuroimage.2009.09.043
- Logue, M. W., Panizzon, M. S., Elman, J. A., Gillespie, N. A., Hatton, S. N., Gustayson, D. E., . . . Kremen, W. S. (2019). Use of an Alzheimer's disease polygenic risk score to identify mild cognitive impairment in adults in their 50s. *Molecular psychiatry*, *24*(3), 421-430. doi:10.1038/s41380-018-0030-8
- Lyons, M. J., Panizzon, M. S., Liu, W., McKenzie, R., Bluestone, N. J., Grant, M. D., . . . Xian, H. (2017). A longitudinal twin study of general cognitive ability over four decades. *Dev Psychol*, *53*(6), 1170-1177. doi:10.1037/dev0000303
- Lyons, M. J., York, T. P., Franz, C. E., Grant, M. D., Eaves, L. J., Jacobson, K. C., . . . Kremen, W. S. (2009). Genes determine stability and the environment determines change in cognitive ability during 35 years of adulthood. *Psychol Sci*, *20*(9), 1146-1152. doi:10.1111/j.1467-9280.2009.02425.x

- Pentz M.A., Chou C.P. (2019). Measurement invariance in longitudinal clinical research assuming change from development and intervention. *J Consult Clin Psychol.* 62(3), 450-62. doi: 10.1037//0022-006x.62.3.450. PMID: 8063972
- Radloff, L. S. (2016). The CES-D Scale. *Applied psychological measurement*, 1(3), 385-401. doi:10.1177/014662167700100306
- Sanderson-Cimino, M., Panizzon, M. S., Elman, J. A., Gustavson, D. E., Franz, C. E., Reynolds, C. A., . . . Kremen, W. S. (2019). Genetic and environmental architecture of processing speed across midlife. *Neuropsychology*, 33(6), 862-871. doi:10.1037/neu0000551
- Smid, S. C., & Rosseel, Y. (2020). SEM with small samples: Two-step modeling and factor score regression versus Bayesian estimation with informative priors. In *Small sample size solutions* (pp. 239-254). Routledge.
- Schaie, K. W., Maitland, S. B., Willis, S. L., & Intrieri, R. C. (1998). Longitudinal invariance of adult psychometric ability factor structures across 7 years. *Psychology and Aging*, 13(1), 8.
- Tyrell, F. A., Yates, T. M., Widaman, K. F., Reynolds, C. A., & Fabricius, W. V. (2019). Data harmonization: Establishing measurement invariance across different assessments of the same construct across adolescence. *Journal of Clinical Child & Adolescent Psychology*, 48(4), 555-567. <https://doi.org/10.1080/15374416.2019.1622124>
- Wechsler, D. (1997). *WAIS-III: Wechsler Adult Intelligence Scale*. San Antonio, TX: Psychological Corporation

## Supplemental Tables

Table S1. Correlations between Everyday Cognition (ECOG) subscales for participant ratings (left of diagonal) and informant ratings (right of diagonal) ( $n=381$ ).

|                                       | Subjective<br>Memory<br>Decline | Subjective<br>Executive<br>Function Decline | Subjective<br>Language<br>Decline | Subjective<br>Visuospatial<br>Decline |
|---------------------------------------|---------------------------------|---------------------------------------------|-----------------------------------|---------------------------------------|
|                                       | <i>r</i>                        | <i>r</i>                                    | <i>r</i>                          | <i>r</i>                              |
| Subjective Memory Decline             | -                               | .53***                                      | .64***                            | .38***                                |
| Subjective Executive Function Decline | .54***                          | -                                           | .55**                             | .44***                                |
| Subjective Language Decline           | .57***                          | .68***                                      | -                                 | .48*                                  |
| Subjective Visuospatial Decline       | .35***                          | .36***                                      | .48***                            | -                                     |

Note. Correlations among participant-rated ECOG subscales are to the left of the diagonal; correlations among informant-rated ECOG subscales are to the right of the diagonal. Correlations are calculated using Spearman-Rank.

\* $p < .05$

\*\* $p < .01$

\*\*\* $p < .001$

Table S2. Correlations of major variables with objective cognitive decline ( $n=287$ ).

|                                       | Objective<br>Cognitive Decline | Objective<br>Memory Decline | Objective<br>Executive<br>Function Decline | Objective<br>Fluency Decline | Objective<br>Visuospatial<br>Decline |
|---------------------------------------|--------------------------------|-----------------------------|--------------------------------------------|------------------------------|--------------------------------------|
|                                       | <i>r</i>                       | <i>r</i>                    | <i>r</i>                                   | <i>r</i>                     | <i>r</i>                             |
| Rostral-Middle LC                     | .03                            | -.02                        | -.02                                       | -.02                         | .08                                  |
| Caudal LC                             | .06                            | .06                         | .05                                        | .01                          | .06                                  |
| ECog Scale                            |                                |                             |                                            |                              |                                      |
| Participant Ratings                   |                                |                             |                                            |                              |                                      |
| Subjective Cognitive Decline          | -.03                           | .10                         | .003                                       | .08                          | .04                                  |
| Subjective Memory Decline             | -.01                           | .11*                        | -.01                                       | .10                          | .01                                  |
| Subjective Executive Function Decline | -.001                          | .08                         | .01                                        | .09                          | .02                                  |
| Subjective Language Decline           | -.06                           | .05                         | .01                                        | .04                          | .05                                  |
| Subjective Visuospatial Decline       | -.02                           | .14**                       | .01                                        | .03                          | .02                                  |
| Informant Ratings                     |                                |                             |                                            |                              |                                      |
| Subjective Cognitive Decline          | .07                            | .16**                       | .06                                        | -.03                         | .18**                                |
| Subjective Memory Decline             | .08                            | .13*                        | .10                                        | .05                          | .11*                                 |
| Subjective Executive Function Decline | .05                            | .11*                        | .02                                        | -.04                         | .13*                                 |
| Subjective Language Decline           | .08                            | .18**                       | .003                                       | -.05                         | .18**                                |
| Subjective Visuospatial Decline       | -.02                           | .05                         | -.02                                       | -.06                         | .11                                  |

Note. Correlations are calculated using Spearman-Rank. ECOG=Everyday Cognition scale; LC=locus coeruleus.

\* $p < .05$

\*\* $p < .01$

\*\*\* $p < .001$

Table S3. Associations between Locus Coeruleus and ECOG scales when adjusting for education ( $n=381$ ).

| Participant Rating        | Subjective Cognitive Decline |       | Subjective Memory Decline |       | Subjective Executive Function Decline |       | Subjective Language Decline |       | Subjective Visuospatial Decline |       |
|---------------------------|------------------------------|-------|---------------------------|-------|---------------------------------------|-------|-----------------------------|-------|---------------------------------|-------|
|                           | $\beta$<br>(95%CI)           | $p^*$ | $\beta$<br>(95%CI)        | $p^*$ | $\beta$<br>(95%CI)                    | $p^*$ | $\beta$<br>(95%CI)          | $p^*$ | $\beta$<br>(95%CI)              | $p^*$ |
| Rostral LC <sub>CNR</sub> | -.18<br>(-.28 to -.07)       | .001  | -.15<br>(-.25 to -.04)    | .008  | -.15<br>(-.26 to -.04)                | .007  | -.13<br>(-.24 to -.02)      | .018  | -.15<br>(-.26 to -.04)          | .007  |
| Caudal LC <sub>CNR</sub>  | .03<br>(-.08 to .13)         | .612  | .003<br>(-.10 to .11)     | .953  | .002<br>(-.10 to .11)                 | .962  | .04<br>(-.06 to .15)        | .420  | .03<br>(-.08 to .13)            | .637  |
| Education                 | -.06<br>(-.11 to -.02)       | .005  | -.04<br>(-.08 to .01)     | .103  | -.05<br>(-.10 to -.01)                | .028  | -.06<br>(-.10 to -.01)      | .013  | -.06<br>(-.10 to -.01)          | .015  |
| Age (years)               | .10<br>(-.001 to .19)        | .050  | .09<br>(-.01 to .19)      | .073  | .05<br>(-.05 to .15)                  | .309  | .15<br>(.05 to .25)         | .004  | -.002<br>(-.10 to .10)          | .974  |
| Depressive Symptoms       | .25<br>(-.15 to .34)         | <.001 | .19<br>(.10 to .29)       | <.001 | .22<br>(.12 to .32)                   | <.001 | .23<br>(.13 to .33)         | <.001 | .18<br>(.08 to .28)             | <.001 |
| Physical Morbidities      | .08<br>(-.02 to .18)         | .101  | .12<br>(-.02 to .22)      | .015  | .01<br>(-.09 to .11)                  | .818  | .07<br>(-.03 to .17)        | .157  | .05<br>(-.05 to .15)            | .360  |
| Informant Rating          |                              |       |                           |       |                                       |       |                             |       |                                 |       |
| Rostral LC <sub>CNR</sub> | -.10<br>(-.20 -.01)          | .074  | -.03<br>(-.15 to .10)     | .677  | -.05<br>(-.14 to .05)                 | .330  | .003<br>(-.17 to .17)       | .971  | -.04<br>(-.15 to .08)           | .524  |
| Caudal LC <sub>CNR</sub>  | -.07<br>(-.03 to .16)        | .188  | .06<br>(-.05 to .16)      | .312  | .06<br>(-.03 to .15)                  | .200  | .12<br>(-.03 to .27)        | .104  | .09<br>(-.02 to .19)            | .104  |
| Education                 | -.05<br>(-.09 to -.004)      | .031  | -.01<br>(-.06 to .04)     | .737  | -.02<br>(-.06 to .02)                 | .317  | -.05<br>(-.12 to .03)       | .196  | -.02<br>(-.08 to .03)           | .417  |
| Age (years)               | -.01<br>(-.11 to .10)        | .917  | .01<br>(-.10 to .12)      | .828  | .10<br>(.01 to .18)                   | .039  | -.03<br>(-.19 to .14)       | .741  | .08<br>(-.04 to .20)            | .171  |
| Depressive Symptoms       | -.02<br>(-.11 to .07)        | .719  | .05<br>(-.05 to .14)      | .324  | -.03<br>(-.11 to .06)                 | .543  | .02<br>(-.12 to .16)        | .779  | -.03<br>(-.15 to .08)           | .564  |
| Physical Morbidities      | .05<br>(-.05 to .15)         | .319  | -.01<br>(-.12 to .09)     | .792  | .01<br>(-.08 to .09)                  | .847  | -.02<br>(-.18 to .14)       | .810  | -.06<br>(-.19 to .07)           | .326  |

Notes. Each column represents an ECOG domain regressed on predictors shown in the rows. Rows under "Participant Rating" show effects when predicting respective ECOG domains using participant ratings; rows under the "Informant Rating" show effects when predicting respective ECOG domains using informant ratings. Models were assessed in a general estimating equation nesting for twin pairs. CNR=contrast-to-noise ratio; ECOG=Everyday Cognition scale; LC=Locus Coeruleus.

\*P-values for effects outside of the hypothesized relationship with rostral-middle LC have been corrected for multiple testing using FDR.

Table S4. Associations between Locus Coeruleus and ECOG scales when excluding people with MCI ( $n=324$ ).

| Participant Rating        | Subjective Cognitive Decline |       | Subjective Memory Decline |       | Subjective Executive Function Decline |       | Subjective Language Decline |       | Subjective Visuospatial Decline |       |
|---------------------------|------------------------------|-------|---------------------------|-------|---------------------------------------|-------|-----------------------------|-------|---------------------------------|-------|
|                           | $\beta$<br>(95%CI)           | $p^*$ | $\beta$<br>(95%CI)        | $p^*$ | $\beta$<br>(95%CI)                    | $p^*$ | $\beta$<br>(95%CI)          | $p^*$ | $\beta$<br>(95%CI)              | $p^*$ |
| Rostral LC <sub>CNR</sub> | -.16<br>(-.27 to -.04)       | .007  | -.12<br>(-.23 to .0001)   | .050  | -.14<br>(-.26 to -.03)                | .018  | -.12<br>(-.24 to -.004)     | .043  | -.13<br>(-.24 to -.03)          | .013  |
| Caudal LC <sub>CNR</sub>  | .01<br>(-.10 to .12)         | .920  | -.04<br>(-.16 to .07)     | .610  | -.003<br>(-.12 to .11)                | .957  | .02<br>(-.09 to .13)        | .725  | .05<br>(-.05 to .15)            | .672  |
| Age (years)               | .07<br>(-.04 to .17)         | .265  | .05<br>(-.06 to .16)      | .458  | .03<br>(-.08 to .14)                  | .824  | .12<br>(.01 to .22)         | .058  | .01<br>(-.09 to .10)            | .858  |
| Depressive Symptoms       | .26<br>(.15 to .36)          | <.001 | .21<br>(.10 to .31)       | <.001 | .25<br>(-.14 to .35)                  | <.001 | .26<br>(.15 to .36)         | <.001 | .13<br>(.04 to .23)             | .024  |
| Physical Morbidities      | .09<br>(-.01 to .19)         | .160  | .14<br>(.04 to .25)       | .014  | .03<br>(-.08 to .13)                  | .824  | .08<br>(-.02 to .18)        | .176  | .03<br>(-.06 to .12)            | .703  |
| Informant Rating          |                              |       |                           |       |                                       |       |                             |       |                                 |       |
| Rostral LC <sub>CNR</sub> | -.06<br>(-.19 to .07)        | .336  | .01<br>(-.13 to .15)      | .878  | -.06<br>(-.17 to .06)                 | .312  | -.01<br>(-.21 to .19)       | .904  | -.10<br>(-.23 to .03)           | .118  |
| Caudal LC <sub>CNR</sub>  | .02<br>(-.12 to .16)         | .829  | .07<br>(-.07 to .20)      | .453  | .06<br>(-.06 to .18)                  | .472  | .07<br>(-.21 to .19)        | .780  | .18<br>(.04 to .33)             | .052  |
| Age (years)               | -.01<br>(-.14 to .11)        | .829  | .08<br>(-.05 to .20)      | .453  | .09<br>(-.02 to .19)                  | .456  | -.06<br>(-.26 to .13)       | .780  | .09<br>(-.05 to .23)            | .380  |
| Depressive Symptoms       | -.02<br>(-.14 to .09)        | .829  | .02<br>(-.08 to .13)      | .670  | -.06<br>(-.16 to .04)                 | .472  | .04<br>(-.12 to .21)        | .780  | -.04<br>(-.17 to .09)           | .602  |
| Physical Morbidities      | .08<br>(-.04 to .21)         | .744  | -.06<br>(-.17 to .05)     | .453  | .001<br>(-.10 to .10)                 | .991  | .02<br>(-.17 to .21)        | .794  | -.04<br>(-.18 to .11)           | .602  |

Notes. Each column represents an ECOG domain regressed on predictors shown in the rows. Rows under "Participant Rating" show effects when predicting respective ECOG domains using participant ratings; rows under the "Informant Rating" show effects when predicting respective ECOG domains using informant ratings. Models were assessed in a general estimating equation nesting for twin pairs. CNR=contrast-to-noise ratio; ECOG=Everyday Cognition scale; LC=Locus Coeruleus.

\*P-values for effects outside of the hypothesized relationship with rostral-middle LC have been corrected for multiple testing using FDR.

Table S5. Associations of Locus Coeruleus and Hippocampal Volume to ECOG scales ( $n=361$ ).

| Participant Rating                  | Subjective Cognitive Decline |       | Subjective Memory Decline |       | Subjective Executive Function Decline |       | Subjective Language Decline |       | Subjective Visuospatial Decline |       |
|-------------------------------------|------------------------------|-------|---------------------------|-------|---------------------------------------|-------|-----------------------------|-------|---------------------------------|-------|
|                                     | $\beta$<br>(95%CI)           | $p^*$ | $\beta$<br>(95%CI)        | $p^*$ | $\beta$<br>(95%CI)                    | $p^*$ | $\beta$<br>(95%CI)          | $p^*$ | $\beta$<br>(95%CI)              | $p^*$ |
| Hippocampal Volume                  | -.04<br>(-.14 to .06)        | .640  | -.06<br>(-.17 to .04)     | .452  | -.02<br>(-.12 to .08)                 | .691  | -.05<br>(-.15 to .05)       | .476  | .03<br>(-.06 to .13)            | .640  |
| Informant Rating Hippocampal Volume | -.05<br>(-.14 to .05)        | .500  | -.07<br>(-.17 to .03)     | .318  | .02<br>(-.07 to .11)                  | .646  | -.18<br>(-.33 to -.02)      | .078  | -.09<br>(-.21 to .03)           | .224  |

Notes. Each column represents an ECOG domain regressed on predictors shown in the rows. Rows under "Participant Rating" show effects when predicting respective ECOG domains using participant ratings; rows under the "Informant Rating" show effects when predicting respective ECOG domains using informant ratings. Models were assessed in a general estimating equation nesting for twin pairs. Models included early life cognitive ability, age, depressive symptoms, and physical morbidities as covariates. CNR=contrast-to-noise ratio; ECOG=Everyday Cognition scale; LC=Locus Coeruleus.

\*P-values for effects outside of the hypothesized relationship with rostral-middle LC have been corrected for multiple testing using FDR.

### Supplemental Figure

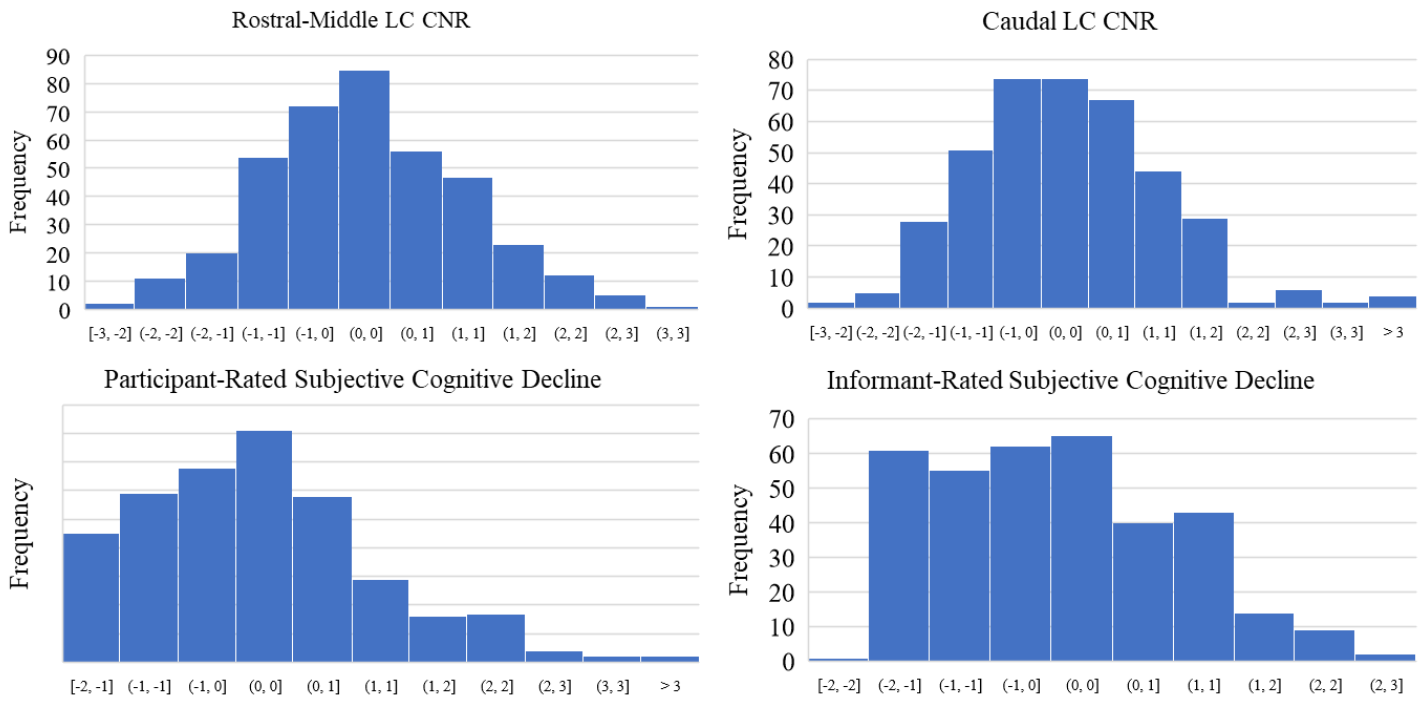

Figure S1. Distributions of major variables using histograms. Note. Participant-rated and informant-rated subjective cognitive decline was log transformed from its original scale. CNR=contrast to noise ratio; LC=locus coeruleus.
